# Supplementary material for: Interventional hepatic apoC-III knockdown improves atherosclerotic plaque stability and remodeling by triglyceride lowering
Source: JCI journal article supplement (doi:10.1172/jci.insight.158414), 2022-06-02
Supplement: sd1 [file 1]

## Supplementary Materials:

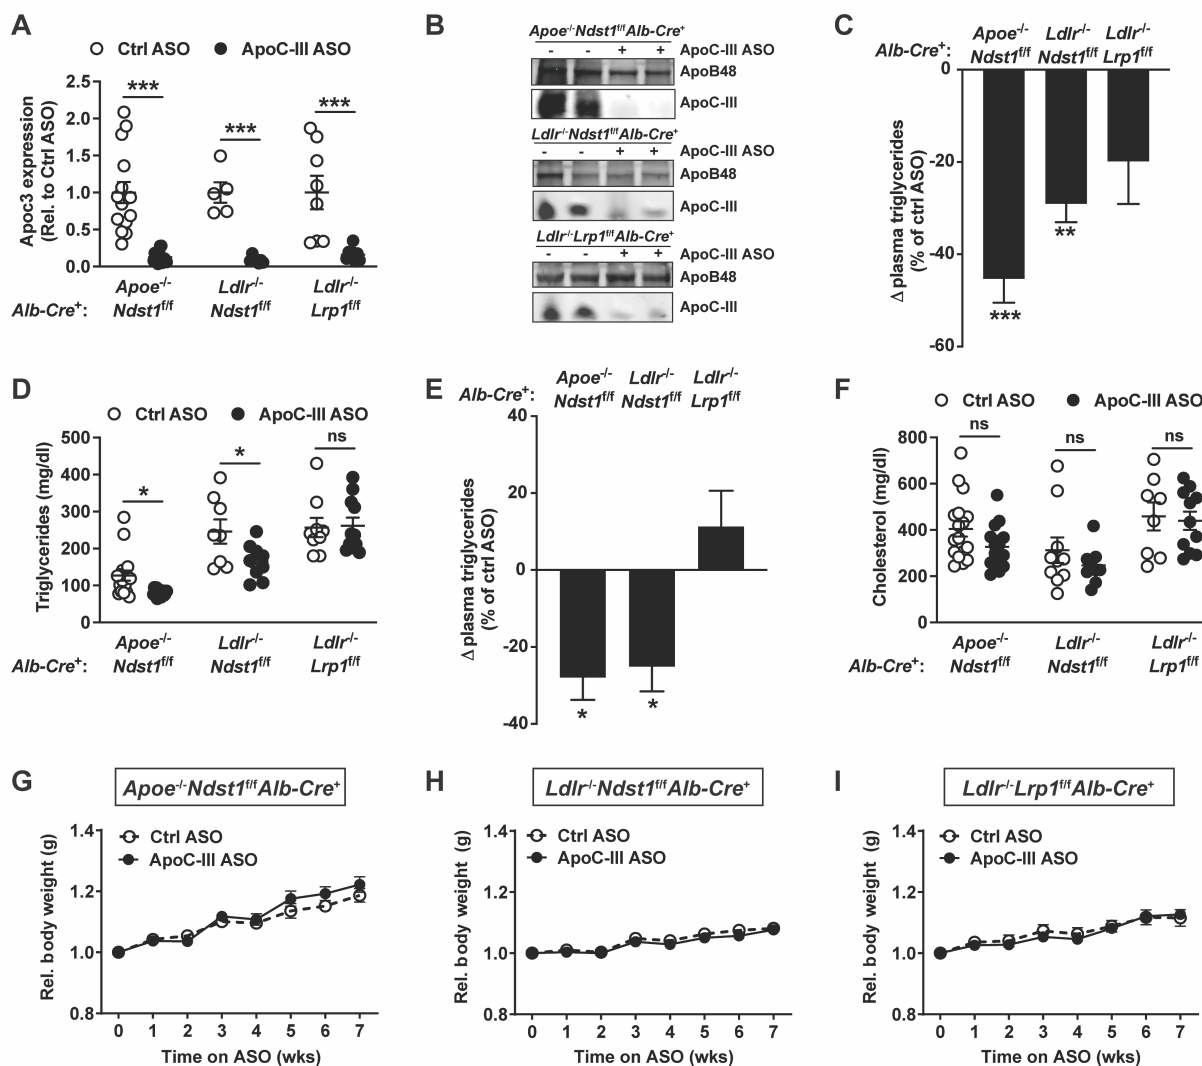

## Supplemental Figure 1. Impact of lowering apoC-III on body weight and plasma lipid

levels in mice fed a chow diet. Mice were treated with control ASO or apoC-III ASO (50

mg/kg/body weight) for 8 weeks. (A) Hepatic *Apoc3* gene expression in *ApoE<sup>-/-</sup>Ndst1<sup>fl/fl</sup>Alb-Cre<sup>+</sup>* (n = 18-19/group), *Ldlr<sup>-/-</sup>Ndst1<sup>fl/fl</sup>Alb-Cre<sup>+</sup>* (n = 13-16/group), and *Ldlr<sup>-/-</sup>Lrp1<sup>fl/fl</sup>Alb-Cre<sup>+</sup>* mice (n = 10-12/group) on either control or apoC-III ASO. Values are expressed relative to control ASO.

(B) Pooled plasma samples (2  $\mu$ l, n = 3/pool) were analyzed by Western blotting with antibodies

against apoB and apoC-III. (C) Relative changes in plasma triglyceride levels after 8 weeks of

apoC-III ASO compared to control ASO. **(D)** Fasting plasma triglyceride levels and **(E)** relative changes in triglycerides compared to control ASO after 4 weeks of ASO treatment (n = 8-19). **(F)** Cholesterol levels after 4 weeks of treatment (n = 8-19). Relative body weight in **(G)** *Apoe*<sup>-/-</sup> *Ndstl*<sup>f/f</sup> *Alb-Cre*<sup>+</sup> (n = 18-19/group), **(H)** *Ldlr*<sup>-/-</sup> *Ndstl*<sup>f/f</sup> *Alb-Cre*<sup>+</sup> (n = 13-16/group), and **(I)** *Ldlr*<sup>-/-</sup> *Lrp1*<sup>f/f</sup> *Alb-Cre*<sup>+</sup> mice (n = 10-12/group). Data presented as mean ± SEM. Statistical differences between two groups were calculated using an unpaired two-tailed Student's t test. \**p*<0.05, \*\*\**p*<0.001, ns: not significant.

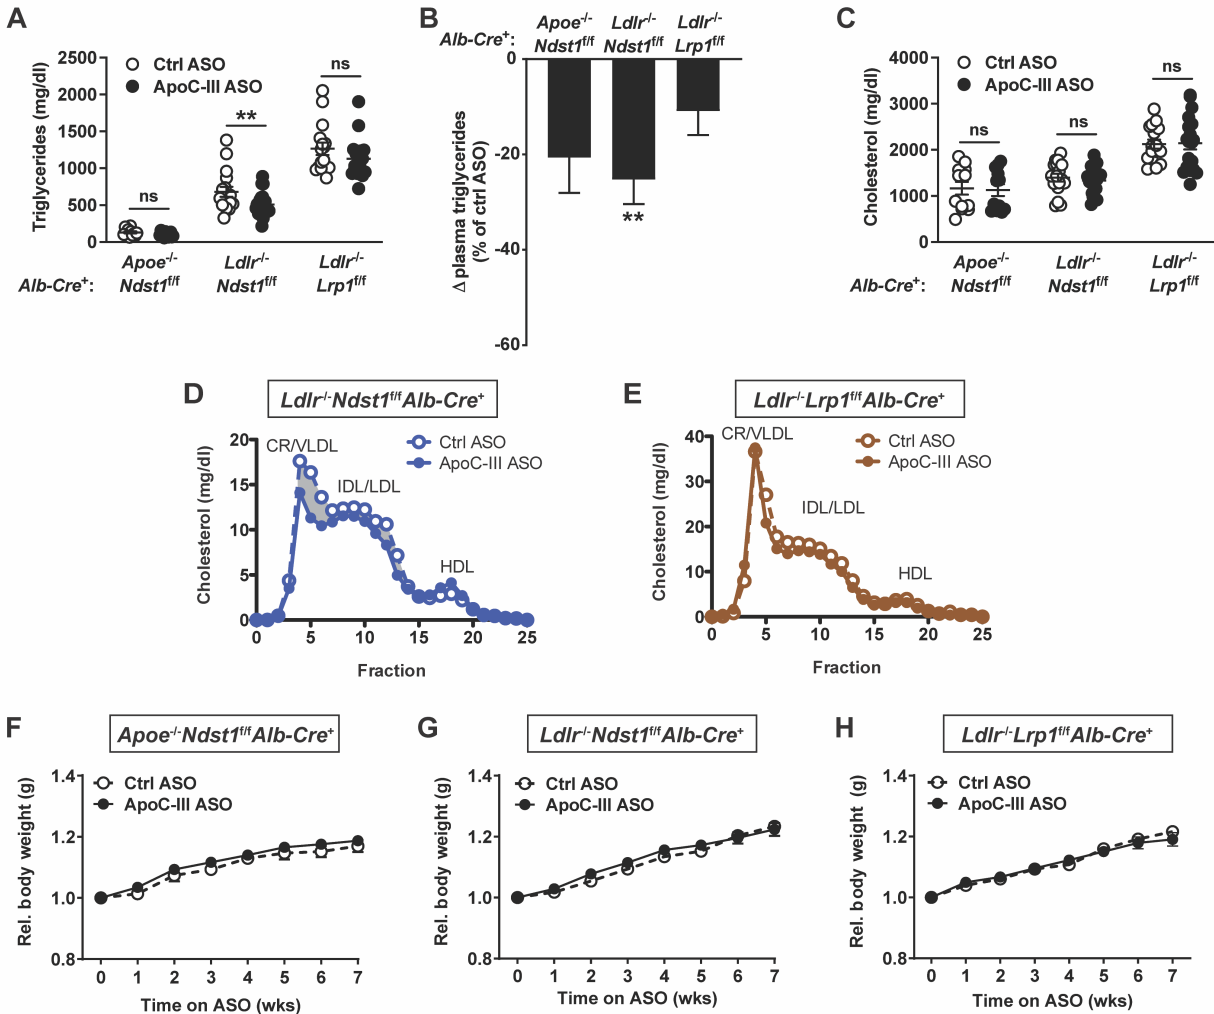

**Supplemental Figure 2. Impact of lowering apoC-III on body weight and plasma lipid levels in mice fed a Western diet.** (A) Fasting plasma triglycerides after 4 weeks of control ASO or apoC-III ASO in Western diet fed *ApoE*<sup>-/-</sup>*Ndst1*<sup>f/f</sup>*Alb-Cre*<sup>+</sup> (n = 11-13/group), *Ldlr*<sup>-/-</sup>*Ndst1*<sup>f/f</sup>*Alb-Cre*<sup>+</sup> (n = 18-22/group), and *Ldlr*<sup>-/-</sup>*Lrp1*<sup>f/f</sup>*Alb-Cre*<sup>+</sup> mice (n = 17-18/group). (B) Relative changes in plasma triglycerides compared to control ASO. (C) Fasting plasma cholesterol levels after 4 weeks of control ASO or apoC-III ASO. (D/E) Pooled plasma lipoproteins from fasted (D) *Ldlr*<sup>-/-</sup>*Ndst1*<sup>f/f</sup>*Alb-Cre*<sup>+</sup> and (E) *Ldlr*<sup>-/-</sup>*Lrp1*<sup>f/f</sup>*Alb-Cre*<sup>+</sup> mice treated with ApoC-III ASO for 6 weeks were analyzed by FPLC (n = 3/pool). Relative body weight of (F) *ApoE*<sup>-/-</sup>*Ndst1*<sup>f/f</sup>*Alb-Cre*<sup>+</sup> (n = 11-13/group), (G) *Ldlr*<sup>-/-</sup>*Ndst1*<sup>f/f</sup>*Alb-Cre*<sup>+</sup> (n = 18-22/group), and

(H) *Ldlr*<sup>-/-</sup>*Lrp1*<sup>f/f</sup>*Alb-Cre*<sup>+</sup> mice (n = 17-18/group). Data presented as mean ± SEM. Statistical differences between two groups were calculated using an unpaired two-tailed Student's t test.

\*\**p* < 0.01, ns: not significant. Data for (A) and (F) for *Apoe*<sup>-/-</sup>*Ndst1*<sup>f/f</sup>*Alb-Cre*<sup>+</sup> mice are taken from (17) for comparison.

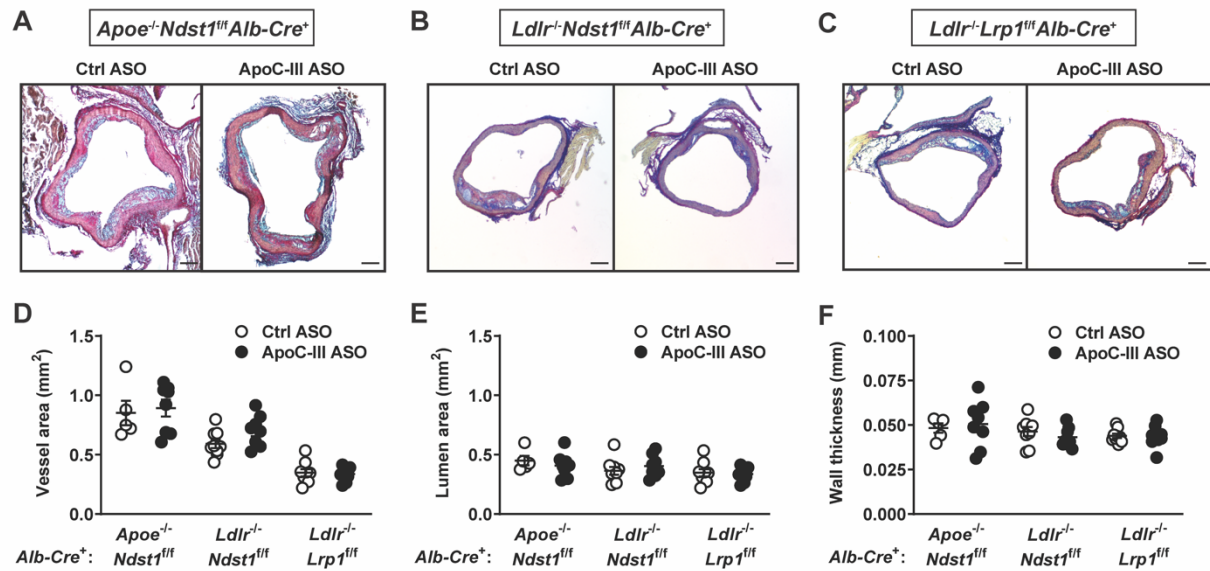

**Supplemental Figure 3. Effects of ApoC-III ASO on parameters of the aortic vessel in mice fed a Western diet.** Representative images of aortic root cross-sections stained with modified Verhoeff-van Gieson (800 µm) in (A) *Apoe<sup>-/-</sup>Ndst1<sup>fl/fl</sup>Alb-Cre<sup>+</sup>*, (B) *Ldlr<sup>-/-</sup>Ndst1<sup>fl/fl</sup>Alb-Cre<sup>+</sup>*, and (C) *Ldlr<sup>-/-</sup>Lrp1<sup>fl/fl</sup>Alb-Cre<sup>+</sup>* mice treated with control ASO or apoC-III ASO for 8 weeks. Quantification of the (D) aortic vessel area, (E) aortic lumen area, and (F) vessel wall thickness (n = 5-8/group). Data presented as mean ± SEM. Statistical differences in lesion size over distance were calculated using a two-way ANOVA with Bonferroni post hoc analysis. Statistical differences between two groups were calculated using an unpaired two-tailed Student's t test. Scale bars equal 100 µm.

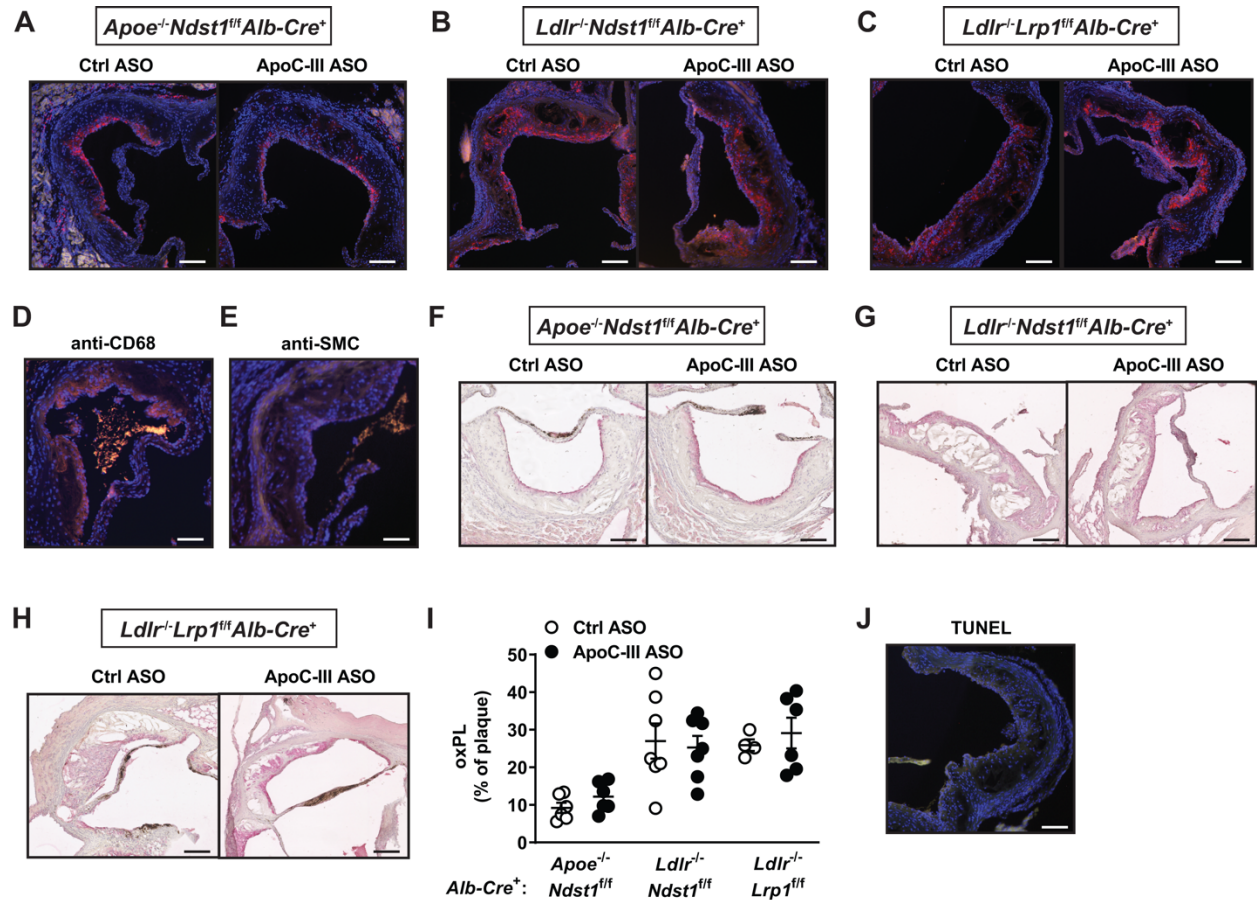

**Supplemental Figure 4. Analysis of aortic root sections for CD68 and oxidized phospholipids in mice fed a Western diet.** (A-C) Representative images of aortic root cross-sections (300  $\mu$ m) of *Apoe*<sup>-/-</sup>*Ndst1*<sup>f/f</sup>*Alb-Cre*<sup>+</sup>, *Ldlr*<sup>-/-</sup>*Ndst1*<sup>f/f</sup>*Alb-Cre*<sup>+</sup>, and *Ldlr*<sup>-/-</sup>*Lrp1*<sup>f/f</sup>*Alb-Cre*<sup>+</sup> mice on Western diet after 8 weeks of control ASO or apoC-III ASO stained for CD68. (D) Negative control for macrophage CD68 stain. (E) Negative control for SMC stain. (F-H) Representative images of aortic root cross-sections (300  $\mu$ m) stained for oxidized phospholipids. (I) Oxidized phospholipids were quantified using a biotinylated E06 antibody (n = 4-7/group). (J) Negative control for TUNEL stain. Scale bars equal 100  $\mu$ m.

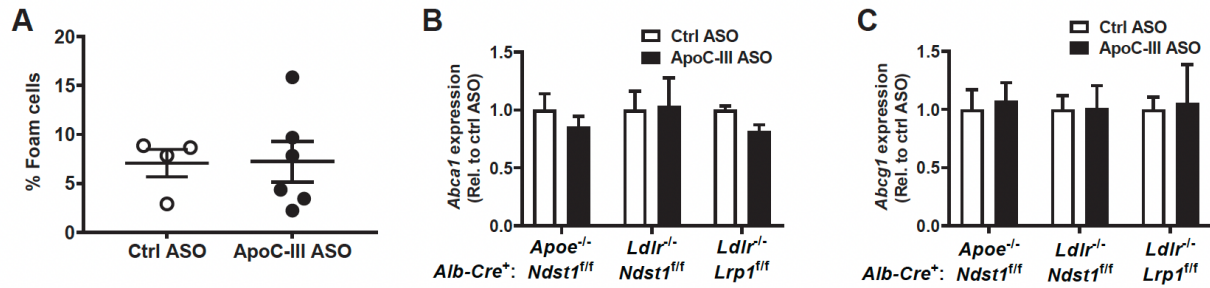

**Supplemental Figure 5. Gene expression study of cholesterol efflux markers in aortic plaques of mice fed a Western Diet.** *Ldlr*<sup>-/-</sup>*Ndst1*<sup>f/f</sup>*Alb-Cre*<sup>+</sup> mice on a Western diet were administered control ASO or apoC-III ASO for 8 weeks. **(A)** Peritoneal macrophages were isolated and foam cell formation was quantified using Oil Red O stain after 2 h of incubation at 37°C (n = 4-6/group). Gene expression of **(B)** *Abca1* and **(C)** *Abcg1* in the aortic plaque relative to control ASO in *Apoe*<sup>-/-</sup>*Ndst1*<sup>f/f</sup>*Alb-Cre*<sup>+</sup>, *Ldlr*<sup>-/-</sup>*Ndst1*<sup>f/f</sup>*Alb-Cre*<sup>+</sup>, and *Ldlr*<sup>-/-</sup>*Lrp1*<sup>f/f</sup>*Alb-Cre*<sup>+</sup> mice (n = 3-8/group). Data presented as mean ± SEM. Statistical differences between two groups were calculated using an unpaired two-tailed Student's t test.



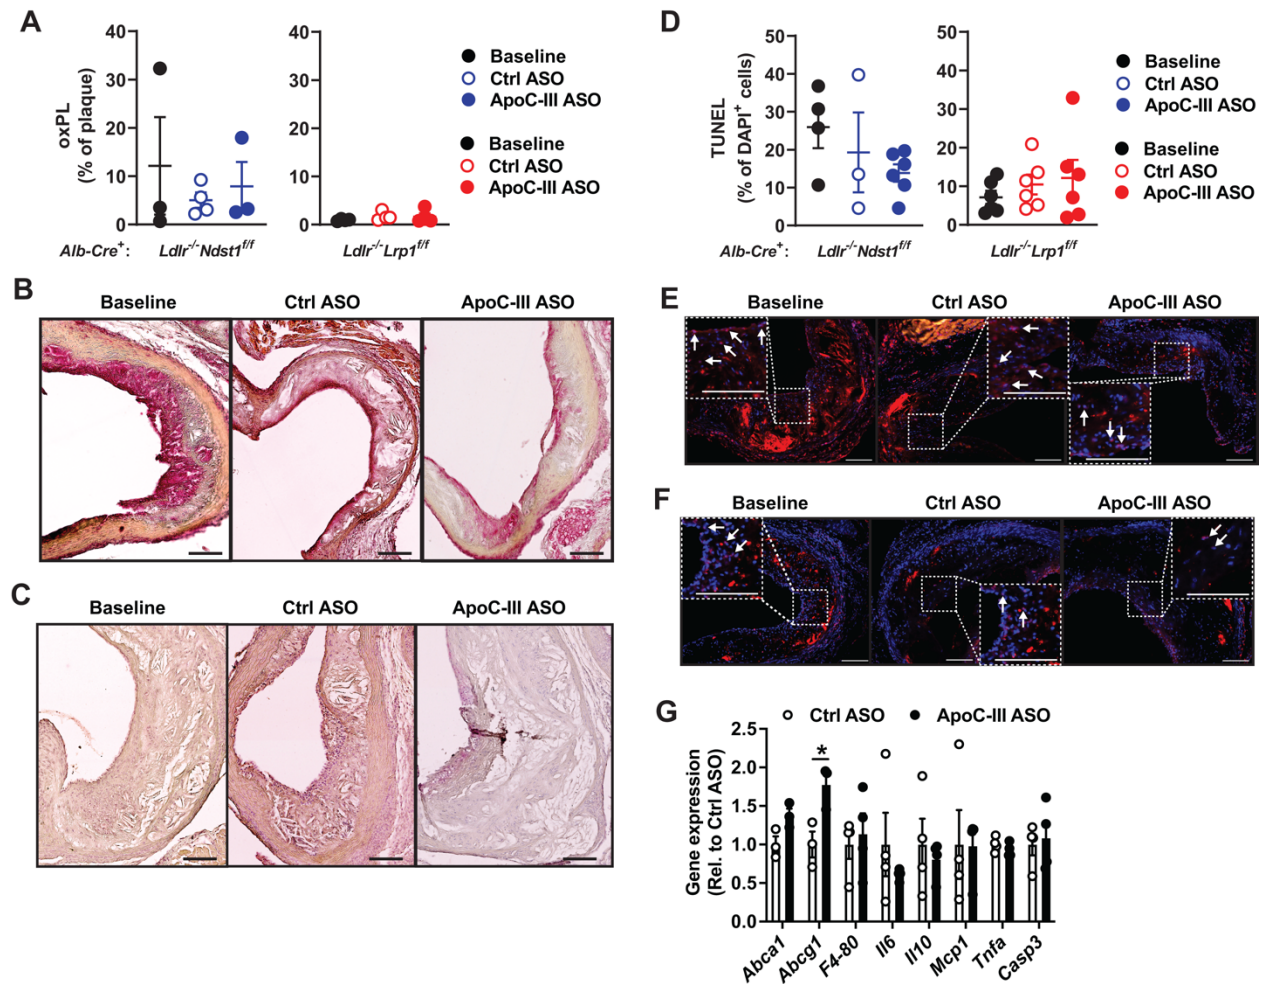

**Supplemental Figure 6. Analysis of aortic root cross sections for oxidized phospholipids and TUNEL after diet intervention.** Following diet intervention and administration of control ASO or apoC-III ASO, oxidized phospholipids and apoptotic cells were analyzed in aortic root cross-sections (700  $\mu$ m). **(A)** Quantification of oxidized phospholipids using a biotinylated E06 antibody (n = 3-4/group). **(B)** Representative images for oxidized phospholipid stain in *Ldlr*<sup>-/-</sup>*Ndst1*<sup>fl/fl</sup>*Alb-Cre*<sup>+</sup> and **(C)** *Ldlr*<sup>-/-</sup>*Lrp1*<sup>fl/fl</sup>*Alb-Cre*<sup>+</sup> mice. **(D)** Quantification of apoptotic cells using a terminal TUNEL stain and DAPI (n = 3-6/group). TUNEL positive cells were quantified relative to total DAPI positive cells. Example images are shown in **(E-F)**. Arrows indicate examples of TUNEL positive cells. **(G)** Gene expression of cholesterol efflux genes (*Abca1*, *Abcg1*),



inflammatory markers (*F4-80*, *Mcp1*, *Il6*, *Il10*, *Tnfa*), and apoptosis (*Casp3*) in aortic lesions of *Ldlr*<sup>-/-</sup>*Ndst1*<sup>fl/fl</sup>*Alb-Cre*<sup>+</sup> mice were quantified relative to control ASO (n = 3-4/group). Data presented as mean ± SEM. Scale bar equals 100 μm. Statistical differences between three groups were calculated using a one-way ANOVA with Tukey post hoc analysis.

**Supplement Table 1. Murine Antisense Oligonucleotide Sequences.**

| <b>Ionis ID</b> | <b>Name</b>  | <b>Target Gene</b> | <b>Sequence</b>             |
|-----------------|--------------|--------------------|-----------------------------|
| ION 440726      | ApoC-III ASO | <i>Apoc3</i>       | 5'-CCAGCTTTATTAGGGACAGC-3'  |
| ION 141923      | Control ASO  | N.A. (scramble)    | 5'-CCTTCCCTGAAGGTTCCCTCC-3' |

**Supplement Table 2: Real-Time PCR Primers.**

| <b>Gene</b>  | <b>Forward Primer</b>           | <b>Reverse Primer</b>            |
|--------------|---------------------------------|----------------------------------|
| <i>Abca1</i> | 5' CGTTTCCGGGAAGTGTCTTA 3'      | 5' GCTAGAGATGACAAGGAGGATGGA 3'   |
| <i>Abcg1</i> | 5' AGGTCTCAGCCTTCTAAAGTTCCTC 3' | 5' TCTCTCGAAGTGAATGAAATTTATCG 3' |
| <i>Apoc3</i> | 5'-TGCAGGGCTACATGGAACAA-3'      | 5'-TCGGACTCCTGCACGCTACTT-3'      |
| <i>Atf4</i>  | 5'-GTTGGTCAGTGCCTCAGACA-3'      | 5'-CATTCGAAACAGAGCATCG-3'        |
| <i>Casp3</i> | 5'-AGATGGCTTGCCAGAAGATAC-3'     | 5'-CTGCAAAGGGACTGGATGAA-3'       |
| <i>Ddit3</i> | 5'-CTGCCTTTTACCTTGGAGAC-3'      | 5'-CGTTTCCTGGGGATGAGATA-3'       |
| <i>F4/80</i> | 5'-CTTTGGCTATGGGCTTCCAGTC-3'    | 5'-GCAAGGAGGACAGAGTTTATCGTG-3'   |
| <i>Il-6</i>  | 5'-CCAGAGATACAAAGAAATGATGG-3'   | 5'-ACTCCAGAAGACCAGAGGAAAT-3'     |
| <i>Il-10</i> | 5'-TGAATTCCCTGGGTGAGAAG-3'      | 5'-TCACTCTTCACCTGCTCCACT-3'      |
| <i>Mcp1</i>  | 5'-AGGTCCCTGTCATGCTTCTG-3'      | 5'-GCTGCTGGTGATCCTCTTGT-3'       |
| <i>Mfge8</i> | 5'-ATCTACTGCCTCTGCCCTGA-3'      | 5'-CCAGACATTTGGCATCATTG-3'       |
| <i>Tbp</i>   | 5'-GAAGCTGCGGTACAATTCCAG-3'     | 5'-CCCCTTGTAACCTTCACCAAT-3'      |
| <i>Tnfa</i>  | 5'-CCAGACCCTCACACTCAGATC-3'     | 5'-CACTTGGTGGTTTGCTACGAC-3'      |
